# Supplementary material for: Leucine-Rich Glioma-Inactivated 1 (LGI1) Protein Stimulates Proliferation and IL-10 Production in Peripheral Blood Mononuclear Cells of Patients with LGI1 Antibody-Mediated Autoimmune Encephalitis In Vitro
Source: MDPI journal article supplement (doi:10.3390/ijms25052581), 2024-02-23
Supplement: s1 [file s1]

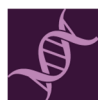

SUPPLEMENT FOR Goihl et al.

**Table S1:** Sex and age data of 10 healthy control volunteers and 4 patients with LGI1 LE.

|                    | Sex    | Age |
|--------------------|--------|-----|
| healthy control 1  | Female | 36  |
| healthy control 2  | Female | 31  |
| healthy control 3  | Female | 63  |
| healthy control 4  | Male   | 50  |
| healthy control 5  | Male   | 54  |
| healthy control 6  | Female | 59  |
| healthy control 7  | Female | 59  |
| healthy control 8  | Male   | 61  |
| healthy control 9  | Female | 54  |
| healthy control 10 | Male   | 63  |
| patient 1          | Female | 60  |
| patient 2          | Female | 67  |
| patient 3          | Male   | 61  |
| patient 4          | Female | 46  |

**Table S2.** Proliferation calculated as stimulation index of PBMC of 4 patients with LGI1 LE or of 10 healthy control volunteers in absence or presence of native or denatured recombinant LGI1 after 4 days of incubation.

| <b>Proliferation (stimulation index)</b> | <b>control</b> | <b>supernatant</b> | <b>native LGI1</b> | <b>denaturated LGI1</b> |
|------------------------------------------|----------------|--------------------|--------------------|-------------------------|
| healthy control 1                        | 1              | 1,68               | 1,89               | 1,98                    |
| healthy control 2                        | 1              | 1,81               | 1,13               | 1,69                    |
| healthy control 3                        | 1              | 0,79               | 0,71               | 1,13                    |
| healthy control 4                        | 1              | 2,94               | 4,11               | 0,92                    |
| healthy control 5                        | 1              | 0,82               | 0,83               | 0,96                    |
| healthy control 6                        | 1              | 1,72               | 1,11               | 2,33                    |
| healthy control 7                        | 1              | 1,09               | 1,59               | 2,19                    |
| healthy control 8                        | 1              | 1,06               | 0,99               | 1,00                    |
| healthy control 9                        | 1              | 0,9                | 1,36               | 1,00                    |
| healthy control 10                       | 1              | 1,04               | 1,22               | 1,32                    |
| patient 1                                | 1              | 0,81               | 0,94               | 0,99                    |
| patient 2                                | 1              | 1,38               | 6,32               | 5,18                    |
| patient 3                                | 1              | 1,31               | 6,50               | 4,67                    |
| patient 4                                | 1              | 1,25               | 27,61              | 13,73                   |

**Table S3.** Concentrations of IFN- $\gamma$  in cell culture supernatants of PBMC of 4 patients with LGI1 LE or of 10 healthy control volunteers in absence or presence of native or denatured recombinant LGI1 after 4 days of incubation.

| IFN- $\gamma$ (pg/ml) | control | supernatant | native LGI1 | denatured LGI1 |
|-----------------------|---------|-------------|-------------|----------------|
| healthy control 1     | 21.0    | 17.2        | 68.9        | 28.6           |
| healthy control 2     | 23.0    | 9.1         | 14.8        | 25.8           |
| healthy control 3     | 20.5    | 23.5        | 31.6        | 40.9           |
| healthy control 4     | 20.1    | 11.9        | 58.1        | 29.4           |
| healthy control 5     | 20.7    | 34.1        | 233.2       | 50.4           |
| healthy control 6     | 9.6     | 8.8         | 9.7         | 10.8           |
| healthy control 7     | 9.1     | 8.1         | 15.1        | 12.8           |
| healthy control 8     | 7.2     | 19.8        | 40.0        | 10.8           |
| healthy control 9     | 7.5     | 7.7         | 10.6        | 8.1            |
| healthy control 10    | 12.8    | 8.9         | 9.9         | 7.9            |
| patient 1             | 14.9    | 22.7        | 30.0        | 14.0           |
| patient 2             | 38.7    | 22.0        | 10.7        | 23.4           |
| patient 3             | 65.3    | 16.8        | 17.5        | 20.0           |
| patient 4             | 12.5    | 27.8        | 53.6        | 37.7           |

**Table S4.** Concentrations of IL-5 in cell culture supernatants of PBMC of 4 patients with LGI1 LE or of 10 healthy control volunteers in absence or presence of native or denatured recombinant LGI1 after 4 days of incubation.

| IL-5 (pg/ml)       | control | supernatant | native LGI1 | denaturated LGI1 |
|--------------------|---------|-------------|-------------|------------------|
| healthy control 1  | 1.6     | 0.8         | 1.4         | 3.8              |
| healthy control 2  | 2.6     | 3.1         | 1.7         | 2.2              |
| healthy control 3  | 2.1     | 2.0         | 2.4         | 1.4              |
| healthy control 4  | 3.3     | 6.1         | 3.6         | 2.9              |
| healthy control 5  | 2.3     | 1.4         | 1.4         | 1.3              |
| healthy control 6  | 1.2     | 1.0         | 1.3         | 1.5              |
| healthy control 7  | 1.8     | 2.4         | 0.9         | 1.0              |
| healthy control 8  | 1.6     | 0.8         | 2.2         | 1.0              |
| healthy control 9  | 0.5     | 0.6         | 1.0         | 0.8              |
| healthy control 10 | 0.7     | 0.8         | 1.1         | 0.9              |
| patient 1          | 2.6     | 5.8         | 3.4         | 2.7              |
| patient 2          | 1.2     | 3.3         | 2.2         | 0.9              |
| patient 3          | 1.6     | 1.2         | 1.8         | 1.6              |
| patient 4          | 1.5     | 1.6         | 1.1         | 2.3              |

**Table S5.** Concentrations of IL-10 in cell culture supernatants of PBMC of 4 patients with LGI1 LE or of 10 healthy control volunteers in absence or presence of native or denatured recombinant LGI1 after 4 days of incubation.

| IL-10 (pg/ml)      | control | supernatant | native LGI1 | denatured LGI1 |
|--------------------|---------|-------------|-------------|----------------|
| healthy control 1  | 7.2     | n.d.        | 538.5       | 460.2          |
| healthy control 2  | 2.5     | 6.6         | 11.4        | 6.8            |
| healthy control 3  | 2.2     | 14.1        | 25.7        | 21.2           |
| healthy control 4  | 2.9     | 33.4        | 427.0       | 85.9           |
| healthy control 5  | 129.1   | 136.7       | 206.0       | 219.4          |
| healthy control 6  | 129.5   | 121.4       | 127.8       | 124.7          |
| healthy control 7  | 126.5   | 131.3       | 244.5       | 162.7          |
| healthy control 8  | 125.9   | 127.5       | 147.6       | 132.5          |
| healthy control 9  | 126.2   | 125.3       | 127.5       | 124.4          |
| healthy control 10 | 124.5   | 125.6       | 124.8       | 125.0          |
| patient 1          | 13.6    | n.d.        | 1149.2      | 871.0          |
| patient 2          | 4.7     | 37.6        | 2071.2      | 432.1          |
| patient 3          | 5.3     | 16.4        | 1594.3      | 205.3          |
| patient 4          | 8.8     | 22.5        | 1022.8      | 249.9          |

**Table S6.** Concentrations of IL-17 in cell culture supernatants of PBMC of 4 patients with LGI1 LE or of 10 healthy control volunteers in absence or presence of native or denatured recombinant LGI1 after 4 days of incubation.

| IL-17 (pg/ml)      | control | supernatant | native LGI1 | denatured LGI1 |
|--------------------|---------|-------------|-------------|----------------|
| healthy control 1  | 7.9     | 8.8         | 15.5        | 14.1           |
| healthy control 2  | 12.7    | 12.8        | 13.2        | 14.4           |
| healthy control 3  | 11.8    | 12.9        | 12.4        | 12.4           |
| healthy control 4  | 12.2    | 13.9        | 40.2        | 40.2           |
| healthy control 5  | 2.5     | 5.0         | 5.7         | 9.3            |
| healthy control 6  | 4.2     | 2.8         | 2.5         | 2.4            |
| healthy control 7  | 2.7     | 3.3         | 0.0         | 3.5            |
| healthy control 8  | 3.4     | 31.6        | 5.9         | 2.5            |
| healthy control 9  | 1.3     | 1.5         | 1.9         | 1.9            |
| healthy control 10 | 3.3     | 5.0         | 0.9         | 1.6            |
| patient 1          | 8.8     | 20.5        | 44.2        | 26.2           |
| patient 2          | 12.4    | 12.1        | 13.3        | 13.1           |
| patient 3          | 11.8    | 12.5        | 13.1        | 13.1           |
| patient 4          | 7.3     | 6.7         | 20.5        | 6.1            |

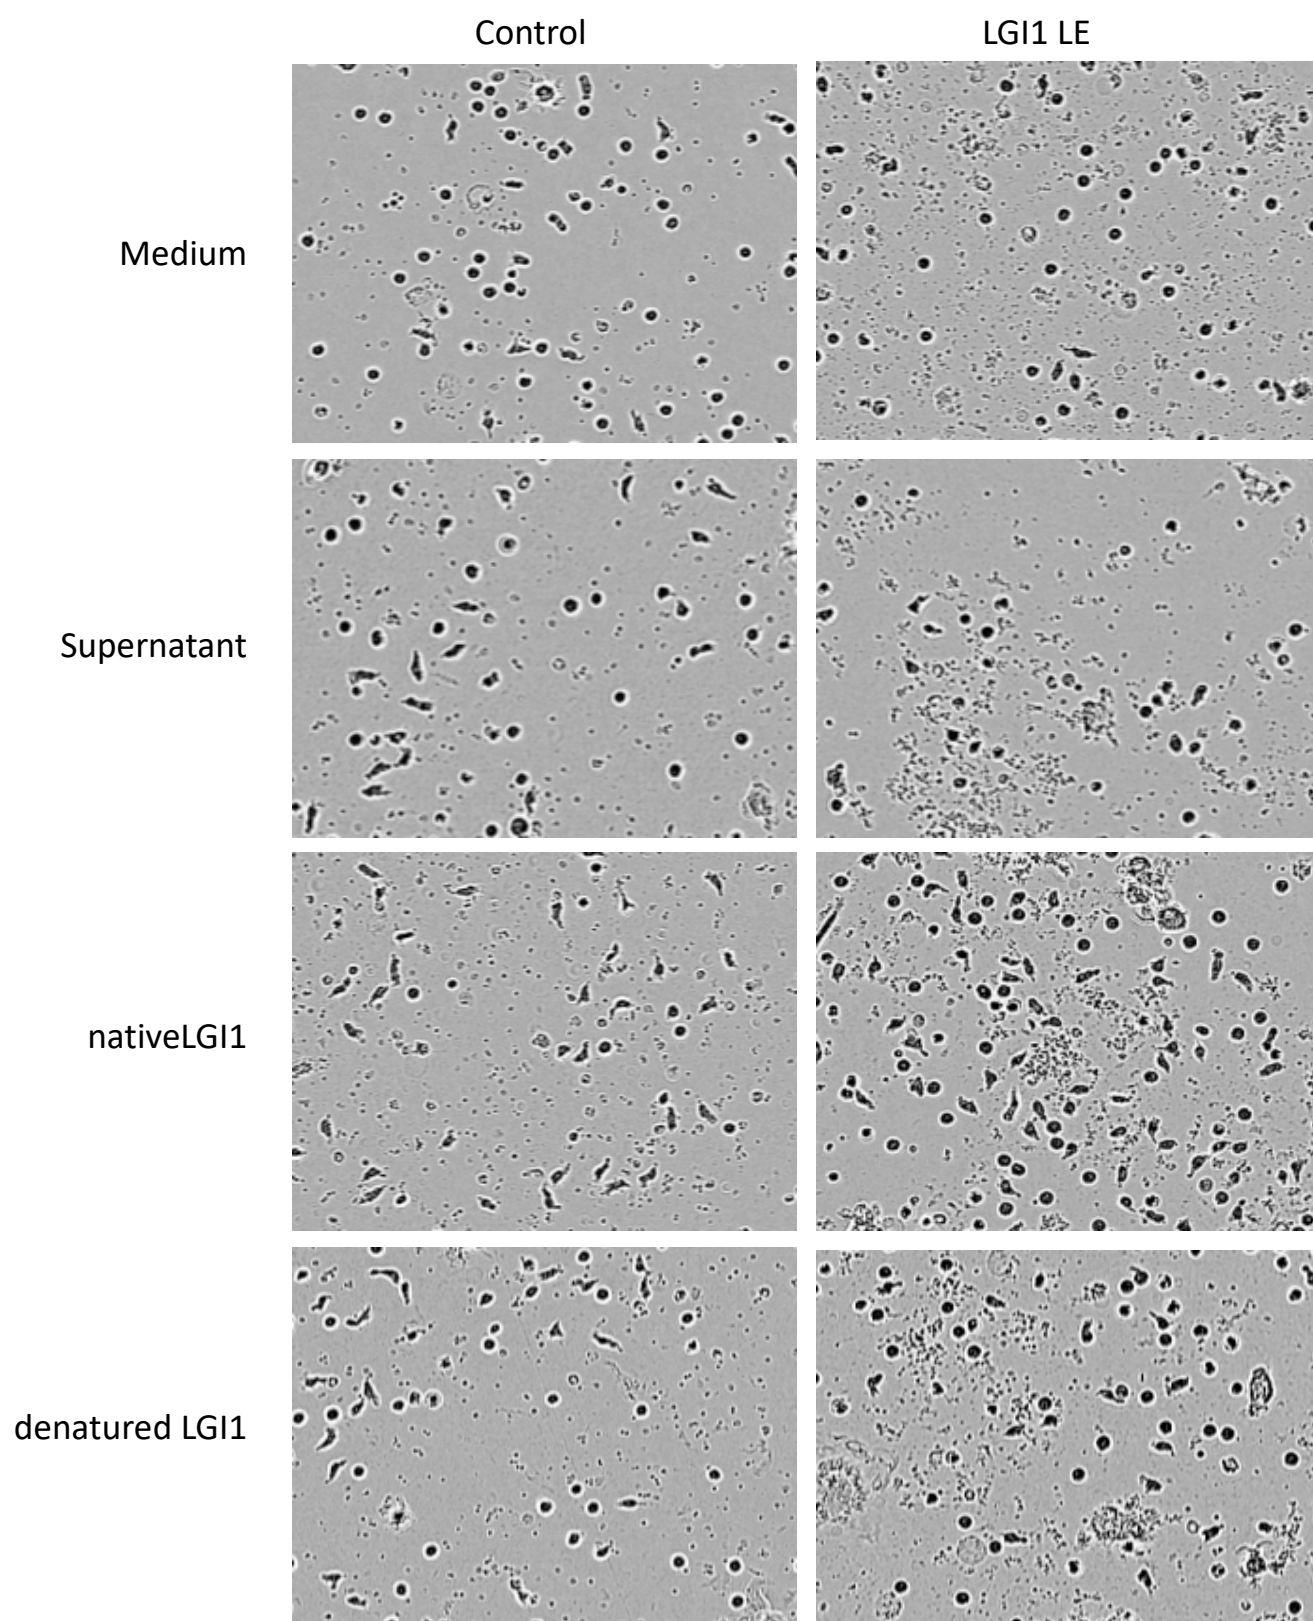

**Figure S1.** Representative pictures of cell cultures of PBMC from a healthy control and a patient with LGI1 ab-mediated LE incubated with medium, HEK 293 cell supernatant, native and denatured LGI1.

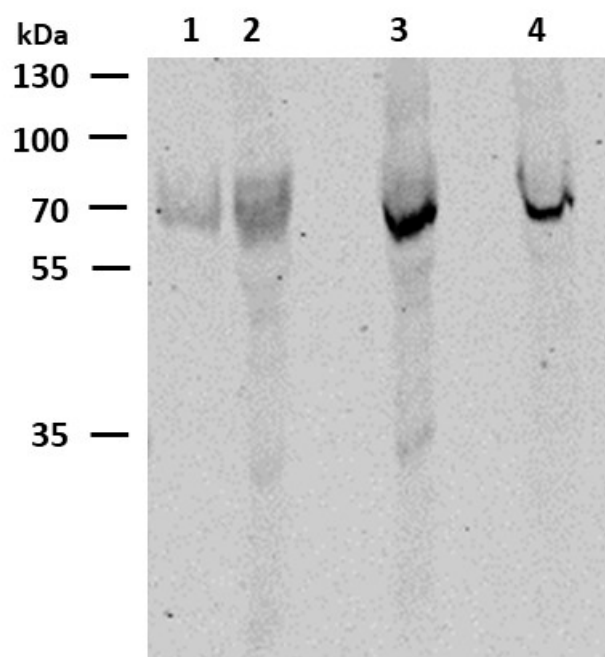

**Figure S2.** Verification of LGI1 expression and purification: Lane 1: ahead of every LGI1 purification protein expression and secretion was checked in supernatants by SDS-PAGE with Coomassie staining. Lane 2: after elution from His-Tag affinity chromatography increased concentration of LGI1 could be detected. Lane 3 and 4: polishing LGI1-containing solution with always 2 runs of size exclusion chromatography improved the purity of the desired protein.
